1 **Running title:** Structural and transcriptional marks of WD

2 Article

3 **Functional gradient perturbation in Wilson disease correlates with structural lesions and**  
4 **transcriptomic specializations**

5 **Authors:** Sheng Hu<sup>1,3,4</sup>, Chuanfu Li<sup>5</sup>, Yanming Wang<sup>3</sup>, Taohua Wei<sup>2,6</sup>, Xiaoxiao Wang<sup>3</sup>, Ting Dong<sup>2,6</sup>, Yulong  
6 Yang<sup>2,6</sup>, Yufeng Ding<sup>2,6</sup>, Bensheng Qiu<sup>3,\*</sup>, Wenming Yang<sup>2,6,\*</sup>

7 **Affiliation:**

8 <sup>1</sup> Institute of Advanced Technology, University of Science and Technology of China; Hefei, Anhui, 230094, China

9 <sup>2</sup> Department of Neurology, The First Affiliated Hospital of Anhui University of Chinese Medicine; Hefei, Anhui,  
10 230031, China

11 <sup>3</sup> Center for Biomedical Imaging, University of Science and Technology of China; Hefei, Anhui, 230026, China.

12 <sup>4</sup> School of Medical Information Engineering, Anhui University of Chinese Medicine; Hefei, Anhui, 230012, China

13 <sup>5</sup> Medical Imaging Center, The First Affiliated Hospital of Anhui University of Chinese Medicine, Hefei, Anhui,  
14 230031, China

15 <sup>6</sup> Key Laboratory of Xinan Medicine of the Ministry of Education, Anhui University of Chinese Medicine, Hefei,  
16 Anhui, 230031, China

17 **\* Corresponding at:**

18 Wenming Yang ([yangwm8810@126.com](mailto:yangwm8810@126.com)) or Bensheng Qiu ([bqiu@ustc.edu.cn](mailto:bqiu@ustc.edu.cn)), Department of Neurology, The  
19 First Affiliated Hospital of Anhui University of Chinese Medicine, 230031 P.R. China; or Center for Biomedical  
20 Imaging, University of Science and Technology of China; Hefei, Anhui, 2300026 P.R. China.

21 **Summary:**

22 4, 573 Main text (not including title, abstract, acknowledgment, references, tables/figure)

23 5 of 5 Color Figures

24 1 of 1 Table

25 1 of 1 Supplementary Methods

26 7 of 7 Supplementary Color Figures

27 7 of 7 Supplementary Tables

28

29 **Abstract**

30 Functional dysregulations in multiple regions are caused by excessive copper deposition in the brain for Wilson  
31 disease (WD). While the biological mechanism of these dysregulations was thought to be the absent or reduced  
32 expression of the ATP7B protein in the liver, mechanisms for such gene impacting brain function remain  
33 unexplored. Here, we used a large cohort of resting-state fMRI data (105 WD patients and 93 healthy controls) to  
34 derive the functional connectome gradient, and its WD-related alterations were further evaluated. Then, we used  
35 Neurosynth, clinical data, and whole-brain gene expression to examine the meta-analytic cognitive function,  
36 clinical phenotypes, and transcriptional specializations related to WD gradient alterations. In parallel, spatial  
37 correlation between gradient and gray matter volume was accessed for both WD patients and healthy controls.  
38 Compared to controls, WD patients exhibited principal gradient alterations in both global and system levels and  
39 regional alterations mainly distributed in the sensorimotor, visual, ventral attention, subcortical, and default mode  
40 networks. Meta-analytic terms and clinical characters showed the correlations of these gradient alterations in  
41 motor-related processing, higher-order cognition, neurological symptom, and age. Results of spatial correlation  
42 revealed structure-function decoupling in multiple networks, especially in subcortical and visual networks. Within  
43 the cortex, the gradient alterations derived transcriptional specializations of WD that mainly display properties  
44 indicative of ion homeostasis, neural development, and motor controls. Within the subcortical regions, we for the  
45 first time characterized the role of the ATP7B gene impacting subcortical function. Transcriptional specializations  
46 of WD within both cortex and subcortical regions were also associated with neurological and psychiatric disorders,  
47 explaining the mechanism underlying complex clinical symptoms from the biological level for WD. In addition, we  
48 further illustrated that structural lesion and gradient perturbation shared similar transcriptional specializations in  
49 both cortex and subcortical regions for WD. These findings bridged functional gradient perturbation to structural  
50 lesions and transcriptional profiles in WD, possibly promoting our understanding of the neurobiological  
51 underpinnings underlying the emergence of complex neurological and psychiatric phenotypes.

52

## 53 INTRODUCTION

54 Wilson disease (WD) is an autosomal recessive disorder of copper metabolism caused by the lack of biliary copper  
55 excretion<sup>1</sup>. The mutation of the ATP7B gene which is most highly expressed in the liver results in the absent and  
56 reduced expression of the ATP7B protein, identifying as causative of copper dysmetabolism<sup>2</sup>. Excessive copper  
57 accumulation in the liver and brain ultimately leads to neurological and psychiatric phenotypes in WD patients<sup>3</sup>.  
58 Animal model of WD, however, has determined that the ATP7B gene is also expressed in neuronal cells of the  
59 hippocampus, olfactory bulbs, cerebellum, brainstem, and cerebral cortex. The concurrent high levels of copper in  
60 these regions further implicated that dysfunctional ATP7B protein is related to local copper accumulation and the  
61 cerebral manifestations of WD<sup>4</sup>.

62 The toxic effect of copper results in damaged astrocytes, neurons, and oligodendrocytes, which gradually build up  
63 structural lesions, especially in the subcortical regions, including the basal ganglia, thalamus, and brainstem<sup>5,6</sup>. Of  
64 note, functional MRI studies revealing functional abnormalities across the entire brain suggested that a  
65 structure-function decoupling may be the leading cause for these abnormalities in WD<sup>7,8</sup>. Further, the defective  
66 cortical function may be due to dysfunction of cortico-subcortical pathways, leading to neurological and psychiatric  
67 symptoms in WD<sup>9,10</sup>. However, the neurobiological mechanisms underlying the brain dysfunction remain to be  
68 elucidated. Given that gene has an essential influence on brain function<sup>11</sup>, brain dysfunction of WD may also be  
69 conceivable to shape by the specific mutated gene, such as ATP7B. Moreover, in consideration of the variability of  
70 gene expression profile across the entire brain, such as the cortex and subcortical regions<sup>12</sup>, their relation to the WD  
71 topology of dysfunction may provide insights into the neurobiological pathways contributing to the neurological  
72 pathogenesis of WD.

73 Brain hierarchical theories uncovered that functional connectome patterns are governed by the graded macroscale  
74 axe that spans the primary sensorimotor areas to transmodal regions of the default mode network (DMN)<sup>13</sup>.  
75 Perturbation in these patterns shapes the clinical phenotypes, such as perception, cognition, and neurological  
76 disorder, in multiple neurodegenerative diseases<sup>14,15</sup>. Furthermore, the macroscale axe of the cortex also is intrinsic  
77 in gene expression and microstructural topography, indicating that the functional basis strongly depends on the  
78 intact gene expression and microstructural profiles<sup>12</sup>. Although many studies revealed alterations in functional  
79 connectivity involving basal ganglia, sensorimotor, and DMN regions in patients with WD<sup>7,8,16</sup>, no studies reported  
80 whether and how these alterations are affected by structural and transcriptomic vulnerability. Therefore, if WD  
81 patients exhibit perturbation in the functional hierarchy, these abnormalities might be associated with gene  
82 expression and structural topography. The illustration of such alterations would provide complementary insights  
83 into the structural and molecular genetic underpinnings of dysfunctional hierarchy in WD.

84 Functional connectome patterns are facilitated by decomposing the functional connectivity data into different  
85 gradients to capture the topography of the connectome<sup>17</sup>. Such a principal functional gradient is presented in the  
86 macroscale organization of functional brain networks, reflecting the hierarchical macroscale axis<sup>13</sup>. This study  
87 aimed to investigate the structural and genetic underpinnings of functional hierarchical perturbation in WD. For this  
88 purpose, we mapped the functional gradient using functional MRI and determined the perturbation in the  
89 hierarchical macroscale axis for WD. Then, the gray volume was mapped based on 3D high-resolution MRI to  
90 apply to a function-structure coupling analysis, revealing whether function-structure is decoupled in WD.  
91 Meanwhile, we calculated the spatial correlation of connectome gradient perturbation with whole-brain gene  
92 expression data from the Allen Human Brain Atlas<sup>18</sup> (AHBA) and further examined whether structural lesions and  
93 gradient perturbation shared similar transcriptional specializations. Gene enrichment analysis was finally used to  
94 probe transcriptomic associations for known pathogenic WD variants, as well as other neurological and psychiatric  
95 disorders.

## 96 **MATERIALS AND METHODS**

### 97 **Participants**

98 We studied a larger cohort of 105 WD patients (65 males, mean  $\pm$  SD age = 27.29  $\pm$  4.02 years) and 93 healthy  
99 controls (60 males, mean  $\pm$  SD age = 24.48  $\pm$  2.26 years) collected from the First Affiliated Hospital of Anhui  
100 University of Chinese Medicine. All patients met the diagnostic criteria, with a ceruloplasmin concentration < 0.1  
101 g/L, a 24-h urinary copper excretion >100  $\mu$ g, and the presence of a K-F ring on slit-lamp examination. Unified  
102 Wilson's Disease Rating Scale neurological examination (UWDRS-N) subscores were recorded as a measure of  
103 neurological disorder severity<sup>19</sup>. Exclusion criterion for WD patients was diagnosed with other diseases. Normal  
104 individuals with a history of mental health problems or other serious diseases were excluded from this study. Ethics  
105 committee of the First Affiliated Hospital of Anhui University of Chinese Medicine gave ethical approval for this  
106 work, and written informed consent was obtained from all participants. Demographic and clinical information are  
107 described in **Table 1**.

### 108 **Data acquisition and preprocessing**

109 Data were obtained at the First Affiliated Hospital of AUCM using a GE MR750 scanner. Resting-state functional  
110 MRI (R-fMRI) was acquired using a gradient-echo single-shot echo-planar imaging sequence, with the following  
111 parameter settings: repetition time (TR), 2000 ms; echo time, 30 ms; flip angle, 90°; matrix size, 64  $\times$  64; field of  
112 view, 220 mm  $\times$  220 mm; resolution of the axial slice, 3.4375 $\times$ 3.4375 mm<sup>2</sup>; slice thickness, 3 mm. A total of 185  
113 volumes were acquired from each individual with 36 slices per volume. T1-weighted images were collected using a

114 T1-3D BRAVO sequence: TR, 8.16 ms; echo time, 3.18 ms; flip angle, 12°; matrix size, 256 × 256; field of view,  
115 256 mm × 256 mm; voxel size, 1 mm<sup>3</sup>; slice thickness, 1 mm. R-fMRI data were preprocessed using a standard  
116 pipeline, including slice timing, head motion correction, normalization, and bandpass, described in **Supplementary**  
117 **Materials**.

### 118 **Gray matter volume estimation**

119 Gray matter (GM) volume measurements were performed using a voxel-based morphometric (VBM) approach<sup>20</sup>  
120 that is embedded in the FSL-VBM toolbox. Briefly, the gray matter was first segmented from the T1-weighted  
121 images, followed by normalized to MNI152 standard space. The normalized images were further applied to create a  
122 study-specific GM template. All native GM images were subsequently registered to the template and modulated for  
123 contraction. The modulated GM images were finally smoothed using an isotropic Gaussian kernel with a sigma of 3  
124 mm. GM volume differences between WD and HCs were evaluated using permutation-based non-parametric  
125 testing with random permutations. The statistical significance was set as  $P < 0.001$ , using a threshold-free cluster  
126 enhancement (TFCE) approach with family wise-error (FWE) correction for multiple comparisons<sup>21</sup>.

### 127 **Preprocessing gene expression data**

128 The microarray gene expression data from six donors (mean age: 42.5 years, 5 males and 1 female) were  
129 downloaded from the Allen Human Brain Atlas (AHBA, <http://human.brain-map.org/>)<sup>22</sup>. The six post-mortem  
130 brains were segmented into 3702 spatially distinct tissue samples, with each tissue sample normalized to Montreal  
131 Neurological Institute (MNI) coordinate space, and indexed with expression levels for more than 20,000 genes  
132 from at least two probes<sup>22</sup>. We respectively conducted gene expression analysis within the cortical and subcortical  
133 regions due to the large transcriptional differences between the two main regions<sup>23</sup>. The standard preprocessed  
134 pipeline of the gene expression microarray data was performed in the current study, including mapping the tissue  
135 samples onto a cortical parcellation with 360 parcels<sup>24</sup> and a subcortical parcellation with 54 parcels<sup>25</sup>, probe  
136 reannotation and selection, and normalization across donors<sup>18</sup>.

### 137 **Functional connectome gradient analysis**

138 We constructed individual functional connectomes at the voxel level. To reduce the computational complexity, we  
139 resample the preprocessed R-fMRI data to a 4-mm isotropic resolution. For each individual, a functional  
140 connectivity (FC) matrix was first constructed by performing the Pearson correlation analysis between each pair of  
141 gray matter nodes (20208 voxels). Then, the FC matrix was further applied to the diffusion map embedding method  
142 to calculate the connectome gradient<sup>17, 26</sup>. Specifically, the FC matrix was thresholded to retain the top 10%

143 connections of each node, and the cosine similarity between each pair of nodes was computed. Further, the  
144 similarity matrix was scaled into a normalized angle matrix to avoid the negative values<sup>27, 28</sup>. The diffusion map  
145 embedding approach was finally applied to identify gradient components that explain most functional connectome  
146 variances. Following the previous recommendation, we set the manifold learning parameter  $\alpha = 0.5$  in the diffusion  
147 process<sup>29</sup>. Given that the principal gradient to an extreme represents the macroscale axis, we primarily focused on  
148 perturbation in the principal gradients of WD<sup>13</sup>. The case-control differences between WD and HCs in the  
149 connectome gradient were evaluated by a two-sample t-test with age, sex, and education as covariates. The false  
150 discovery rate (FDR) was used to achieve multiple comparison corrections at the voxel level. The statistically  
151 significant threshold was set to  $q < 0.05$ . In addition, the whole-brain voxels were assigned to eight systems  
152 according to a cortical atlas with 7 parcels and a Harvard-Oxford probabilistic subcortical atlas. The system-based  
153 differences in connectome gradient between WD and HC were further examined using a paired two-sample t-test.  
154 The findings were further corrected by multiple comparisons using FDR at 0.05.

#### 155 **Association analysis between meta-analytic cognitive terms and gradients changes in WD**

156 The Neurosynth (<https://neurosynth.org/>)<sup>30</sup> was used to evaluate the relationship between the meta-analytic  
157 cognitive terms and functional gradients alternations in WD. The thresholded Z-map derived from the  
158 between-group comparisons of the gradient was first divided into WD-positive (WD > HCs) and WD-negative  
159 (WD < HCs) maps. The ‘decoder’ function in Neurosynth was used to identify the spatial correlations between  
160 each map and the meta-analytic map of each term in the database<sup>31</sup>. Finally, the top 30 cognitive terms were  
161 selected.

#### 162 **Correlation analysis between clinical characters and gradients in WD**

163 We examined the relationships between gradients in perturbed regions and clinical characters, such as UWDRS-N,  
164 age, ceruloplasmin concentration, and 24-h urinary copper excretion, using partial correlations with age and sex  
165 controlled.

#### 166 **Association analysis between the GM volume and gradients**

167 To investigate whether structure-function is decoupled in WD, the spatial association between averaged GM  
168 volume and averaged functional connectome gradients was estimated using spatial correlation analysis. The spatial  
169 correlation analyses were performed based on the whole brain and eight systems. For all spatial correlation analyses,  
170 findings were corrected using permutation tests ( $N = 10,000$ ) at  $P = 0.05$ . The results were further corrected for  
171 multiple comparisons using FDR at 0.05. The spatial correlation was also calculated at the subject level. Then, the

172 differences in spatial correlation between WD and HCs across subjects were accessed using a two-sample t-test,  
173 and the results were corrected by FDR at 0.05. Finally, using a non-parametric bootstrapping approach (10,000  
174 times), we performed a mediation analysis in which altered gradient was taken as an independent variable, GM  
175 volume in altered gradient regions was taken as the mediator, and UWDRS-N was taken as the dependent variable.

#### 176 **Association analysis between gene expression and WD's gradients changes**

177 The spatial correlations between-group differences of principal gradient and gene expression were respectively  
178 examined in cortical and subcortical regions. Given the high dimensionality of AHBA data, we used partial least  
179 squares (PLS) regression<sup>32</sup>, a multivariate linear model, to reveal a group of weighted genes (or PLS components)  
180 that best explained the differences of the gradient. Briefly, we first aligned the gene expression data (10028 genes)  
181 and between-group difference Z-map of the principal gradient to a cortical atlas<sup>24</sup> and subcortical atlas<sup>25</sup>. In PLS  
182 analysis, the gene expression data was used to identify the linear combinations of genes that best predicted response  
183 variables<sup>33</sup> (Z-map between-group difference of the principal gradient). The statistical significance of the first two  
184 PLS components was tested based on 10,000 permutations of the response variables. A bootstrapping approach was  
185 finally used to correct the estimation error of the weight of each gene on each PLS component<sup>33</sup>.

#### 186 **Enrichment analysis**

187 We first ranked the genes according to their bootstrap weights (absolute value). Then, the top 10 percentile of  
188 10028 genes were applied to a web-based gene set analysis toolkit<sup>34</sup> (<https://webgestalt.org>) to uncover biological  
189 processes enriched in the list of genes. The enrichment ratio is calculated as the number of PLS-derived genes  
190 overlapping with each biological process divided by the number of genes expected to overlap by random  
191 permutations. Significant enrichment was determined with Bonferroni FDR-corrected  $q < 0.05$ .

#### 192 **Specificity analysis**

193 The specificity analysis was to assess whether known genes (ATP7B) causing WD was enriched in the PLS  
194 components. We also performed specificity analysis to uncover the enrichment of other neurological and  
195 psychiatric risk genes in the PLS components. The disorder-related risk genes, provided by the AHBA  
196 (<https://help.brain-map.org/display/humanbrain/Documentation>), are listed in **Supplementary Table 1**.

197 We calculated the enrichment ratio (ER) for each PLS component. The ER is defined as the difference between the  
198 mean bootstrap weight of the candidate gene and the mean bootstrap weight of the same number of randomly  
199 permuted genes, which was further divided by the standard deviation weight of the permuted genes<sup>35</sup>. Significance  
200 was determined by the percentile of the bootstrap weight of the candidate genes relative to the bootstrap weights of

201 randomly selected genes from 10,000 permutations. Positive/negative ER of a given condition indicates that the  
202 risk genes are expressed to a higher/lower degree relative to the baseline expression level.

### 203 **Association analysis between structural changes and PLS components**

204 To investigate whether structural changes and disturbances in connectome gradient shared a similar transcriptional  
205 specializations, we calculated the spatial correlations between structural changes and each PLS component in WD.  
206 Structural changes were defined as the absolute value of between-group difference of the GM volume in high  
207 (PLS-score > 0.06) or low (PLS-score < -0.06) gene expression regions. The spatial correlations were corrected for  
208 spatial autocorrelations by using a permutation test (N = 10,000).

## 209 **RESULTS**

### 210 **Perturbation of primary-to-transmodal gradient in WD**

211 The principal gradient explained  $12.2 \pm 1.8\%$  of the total variance in the connectome across all individuals (WD:  
212  $11.8 \pm 1.7\%$ , HC:  $12.9 \pm 1.8\%$ , **Supplementary Fig. 1**), which was organized along graded macroscale axis from  
213 the primary visual/sensorimotor (VIS/SMN) areas to DMN (**Fig. 1a**), being consistent with the previous  
214 observation of connectome gradients from primary to the transmodal regions in healthy brain<sup>17</sup>. The spatial patterns  
215 of principal gradient maps were highly similar between the WD and HCs (Spearman's  $R = 0.9734$ ,  $P < 0.0001$ ,  
216 spatial autocorrelation corrected by permutation tests, **Supplementary Fig. 2**). The global histogram confirmed that  
217 the extreme values were suppressed in WD relative to HCs, while those in the mid-range increased (**Fig 1b**). For  
218 each system, we further computed the gradient score differences between group-averaged maps of WD and HCs by  
219 using paired t-test across voxel. The WD had a higher gradient score in VIS, SMN, VAN, FPN, and SUB but lower  
220 in LIB and DMN (FDR-corrected  $q < 0.05$ , **Fig. 1c** and **Supplementary Table 2**). The results of the secondary  
221 gradient are provided in **Supplementary Figs. 3** and **Supplementary Tables 4**.

### 222 **Changes in connectome gradient in WD**

223 The WD showed lower gradient scores mostly in the DMN [medial temporal pole (mTP) and medial prefrontal  
224 cortex (mPFC), 70.3%] and LIB (19.4%) but higher scores mainly in the VIS [primary visual cortex (V1), 22.8%],  
225 SMN[supplementary motor areas (SMA), 19.9%], VAN (insular, 23.3%) and SUB (striatum, thalamus, 20.6%)  
226 than the HCs (absolute  $d = 0.08$ - $0.19$ , FDR-corrected  $q < 0.05$ , **Fig. 2a**, **Supplementary Table 3**). For secondary  
227 connectome gradients, only one region showed a significantly higher gradient score in WD when compared with  
228 HCs (**Supplementary Figs. 4** and **Supplementary Tables 5**).



229 **Association between gradient changes and cognitive functions in WD**

230 Higher principal gradient scores in WD were mainly involved in motor-related processes, such as movement, motor  
231 imagery, and somatosensory (**Fig2. B and Supplementary Table 6**). Lower principal gradient scores in WD were  
232 correlated with higher-order cognitive processes, including mental states, mentalizing, theory mind, and social  
233 (**Fig2. B and Supplementary Table 6**).

234 **Correlations between the principal gradients and clinical characters**

235 The regions with significantly higher gradient scores in WD were positively correlated with UWDRS-N ( $R =$   
236  $0.2575, P = 0.0105$ ) and age ( $R = 0.4845, P = 4.294 \times 10^{-7}$ ). The regions with significantly lower gradient scores in  
237 WD were negatively correlated with age ( $R = -0.3462, P = 0.00048$ ). No significant correlations were observed  
238 between gradient scores with ceruloplasmin concentration, 24-h urinary copper excretion, and disease duration.

239 **Associations between GM volume and primary-to-transmodal gradient**

240 Evaluating group differences in GM volume between WD and HCs, we found GM volume was significantly  
241 reduced in SMN, VIS, DMN, and SUB in WD (**Supplementary Fig. 6 and Supplementary Table 7**). Conversely,  
242 significant GM volume was increased in VAN, DAN, LIB, and FPN in WD (**Supplementary Fig. 6 and**  
243 **Supplementary Table 7**).

244 High spatial correlations between principal gradient and GM volume were observed in VIS, SMN, VAN, SUB, and  
245 LIB (**Fig. 3b**) in both WD and HCs, but not in the other systems and the whole brain (**Fig. 3a**). In the subject level,  
246 the spatial correlation was significantly different in the extensive networks, especially in VIS and SUB (**Fig. 3c**),  
247 indicating function-structure decoupling in these regions. The spatial correlation between the secondary gradient  
248 and GM volume is revealed in **Supplementary Fig 6**.

249 We also found that the GM volume in regions with higher (meditation effect:  $\beta = 0.09, P = 0.0018$ ) and lower  
250 (meditation effect:  $\beta = -0.09, P = 0.0428$ ) gradient scores in WD partially mediated the relationship between  
251 gradient and UWDRS-N (**Fig. 3d**).

252 **Associations between gene expression and WD-related gradient changes**

253 For cortex, two PLS components explained 23% (PLS-1,  $P < 0.001$ ) and 21% (PLS-2,  $P < 0.001$ ) of the covariance  
254 between the gradient changes of WD and gene expression (**Supplementary Fig. 7**). PLS-1 represented a gene  
255 expression profile with high expression mainly in SMN and VIS but low expression in LIB and DMN (**Fig. 4a**).  
256 PLS-2 characterized by high expression in VAN but low expression in FPN (**Fig. 4a**). The gene enrichment

257 analysis shown that PLS-1 involved in regulation at metal ion transport, ion transmembrane transport, and  
258 transporter activity (FDR < 0.05, **Fig. 4b**), determining the metal ion homeostasis. By contrast, PLS-2 mainly  
259 reflected the muscle system process, circulatory system process, and neuron projection development, as well as  
260 regulation at metal ion transport and ion transmembrane transport (FDR < 0.05, **Fig. 4b**). Specificity analysis  
261 revealed that PLS-1 and PLS-2 were enriched for the risk genes (**Fig. 4c**), such as Schizophrenia (PLS-1: FDR =  
262 0.0095, ER = -3.05; PLS-2: FDR = 0.0023; ER = -3.37), Depression (PLS-1: FDR = 0.0206, ER = -2.46; PLS-2:  
263 FDR = 0.044, ER = 1.90), and Parkinson's disease (PLS-2: FDR = 0.044, ER = 1.94). The GM volume changes had  
264 a significant positive correlation with PLS-1 scores higher than 0.06, indicating that structural impairments and  
265 gradient perturbation in cortical regions may be mediated by the similar transcriptional specializations (**Fig. 4d**).

266 For subcortical regions, two PLS components explained 28% (PLS-1,  $P = 0.0264$ ) and 22% (PLS-2,  $P = 0.0437$ ) of  
267 the covariance between the gradient changes of WD and gene expression (**Supplementary Fig. 7**). PLS-1  
268 represented a gene expression profile with high expression mainly in the pallidum and thalamus but low expression  
269 in hippocampus and striatum (**Fig. 5a**). PLS-2 revealed a high gene expression in the pallidum, striatum, and  
270 amygdala but low expression mainly in the thalamus (**Fig. 5a**). Specificity analysis showed that PLS-1 (**Fig.**  
271 **5b**) was enriched for the risk gene of WD (PLS-1:  $P = 0.022$ , ER = -1.946), with PLS-1 and PLS-2 additionally  
272 enriched for the gene causing Schizophrenia (PLS-1: FDR = 0.0155, ER = -2.73) and Alzheimer's disease (PLS-2:  
273 FDR = 0.0425, ER = -2.16). The GM volume changes had a significant negative correlation with PLS-1 scores  
274 higher than 0.06, indicating that structural impairments and gradient perturbation in subcortical regions also be  
275 mediated by the similar transcriptional specializations (**Fig. 5c**).

## 276 **DISCUSSION**

277 Macroscale hierarchy has been widely regarded as a key principle of brain organization<sup>13</sup>. It has been involved in  
278 multiple systems that span from primary to transmodal networks<sup>17</sup>. Hierarchical representations account for the  
279 spatial arrangement of local processing streams throughout the cerebral cortex, ensuring sensory signals  
280 progressively to integrating as abstract representations<sup>17</sup>. Since WD has been clinically characterized as a disorder  
281 with multiple neurological and psychiatric phenotypes<sup>36</sup>, it may result in errors in information flow from  
282 sensorimotor to cognitive processing. Accordingly, here we assessed the pattern of functional hierarchy in larger  
283 samples of WD and HCs, based on an advanced connectome gradient approach. Both WD and HCs groups revealed  
284 that principal functional gradient mapping captured the macroscale axis of connectivity variations with primary  
285 network and transmodal DMN anchored at two opposite ends and the remaining networks emerging in-between<sup>17</sup>.  
286 Naturally, this gradient of WD was globally suppressed at both ends compared to HCs. Consistent with these

287 results, VBM analysis also illustrated that in WD, GM volume significantly decreased in multiple systems,  
288 including SMN, VIS, and transmodal areas. Further spatial correlations between gradient and GM volume revealed  
289 function-structure decoupled in VIS, VAN, and SUB, suggesting hierarchical imbalances related to structural  
290 alterations. In sum, our multimodal analysis provides converging evidence for that structural vulnerability might  
291 shape the aberrant connectome hierarchy.

292 At the regional level, patients with WD exhibited an extended principal gradient, showing an increase in gradient  
293 score in primary systems such as the SMA and V1, and a decrease in transmodal regions including the mTP and  
294 mPFC. Generally, an important role of SMA and V1 in motor control and visual processing has been identified in  
295 the motor and visual system, particularly for postural stabilization of the body and spatial pattern recognition<sup>37-40</sup>.  
296 Consistent with the clinical impairment in these regions, WD-related abnormalities of intrinsic brain activity in the  
297 SMN and VN have been highlighted in RS-fMRI<sup>8</sup> and tomography-electrophysiology studies<sup>41</sup>. Likewise, cortical  
298 thickness damage in these regions was also reported to be correlated with the neurological symptoms in WD<sup>42</sup>.  
299 DMN areas, such as mPFC and mTP, are thought to be involved in several different functions, such as  
300 self-referential, introspective cognition as well as mentalizing<sup>43, 44</sup>. Of note, patients with WD  
301 have neuropsychological and attention network deficits<sup>9,45</sup>. Moreover, containing these and other nodes in DMN,  
302 multiple previous RS-fMRI studies have already reported a series of results indicative of functional connectivity  
303 alterations in WD<sup>7</sup>. These results were also confirmed by our meta-analysis, revealing WD-related increased  
304 gradient scores in the areas involving low-level sensory and motor-related processes but brain regions with  
305 decreased gradient scores mainly involving higher-order cognitive function. Interestingly, we also observed an  
306 increased gradient score in unimodal areas, such as the insular, which is located between the primary systems and  
307 DMN<sup>17</sup>. Collectively, these findings suggest that the imbalance in the functional hierarchy might arise from the  
308 disorder of local processing streams transformed system-by-system in WD cerebral cortex. More notably, our  
309 results also showed increasing gradient scores in SUB, such as the putamen and thalamus. The SUB is the most  
310 damaged brain structure in WD. Due to the impaired regions leading to disrupted networks<sup>16</sup>, the interaction among  
311 SUB and between subcortico-cortical networks could impact the topology of the subcortical macroscale connectome  
312 in WD. Again, recent studies have reported that connectivity among SUB was highly associated with deficits in  
313 neurological symptoms<sup>46</sup> while subcortico-cortex was related to neuropsychological disorder in WD<sup>9</sup>. In this  
314 context, the relationship between gradient and UWDRS-N was mediated by GM volume alteration, furtherly  
315 attesting that structural vulnerability impacts macroscale hierarchy and ultimately leads to deficits in WD  
316 phenotype. Taking all the above into consideration, our findings indicate that complex clinical symptoms of WD

317 might arise from perturbation in functional hierarchy across individuals that is not merely due to aberrant spatial  
318 patterns, but rather linked to system-level deficits.

319 In addition to offering a novel perspective on the structural underpinning of perturbation in the functional hierarchy,  
320 we incorporated a PLS regression to establish a link between WD-related gradient changes and gene expression.  
321 Within the cortex, PLS-1 reflected regulation of gene expression at ion transmembrane transport, metal ion  
322 transport, and transporter activity. PLS-2 also mediated the regulation of ion transmembrane transport, but more  
323 reflected regulation of neuron projection development and axon development, as well as a muscle system process.  
324 In biology, the transporter is a transmembrane protein that moves ions across biological membranes to accomplish  
325 different biological functions, such as cellular communication and maintaining homeostasis<sup>47</sup>. Ion transport is a  
326 biological process that transports ions against the concentration gradient—from high concentration to low  
327 concentration<sup>48</sup>. Neuron projection is any process extending from a neural cell, such as axons and dendrites. its  
328 development is the progression from neural formation to the mature structure<sup>49</sup> and also promotes neuron  
329 differentiation<sup>50</sup>. The muscle system, in vertebrates, is controlled through the nervous system, and its impaired  
330 leads to different movement disorders<sup>51</sup>. Indeed, WD is a disorder of copper transport within the cell resulting in  
331 copper accumulation in the brain<sup>52</sup>, which further triggers neuron degeneration. Therefore, PLS-1 likely represents  
332 biological mechanisms underlying ion homeostasis inside and outside nerve cells. On the other hand, PLS-2 was  
333 more associated with neural organization and cell growth as well as controlling muscle signaling. The specificity  
334 analysis exhibited that PLS-1 and PLS-2 were both associated with risk genes for schizophrenia and depression and  
335 that PLS-2 was additionally associated with genes causing Parkinson's disease. Although no association between  
336 WD pathogenic gene (ATP7B) and PLS components was observed within the cortex, our results explained why  
337 WD patients present multiple complex neurological and psychiatric symptoms at the biological level.

338 More importantly, within subcortical regions, we demonstrated that PLS-1 was associated with WD pathogenic  
339 gene, which indicates that the ATP7B gene has lower expression in subcortical regions. The present work is the  
340 first to provide evidence for the role of the WD pathogenic gene impacting subcortical function, which is also  
341 attested by an animal model study, revealing that dysfunctional ATP7B protein is related to the local copper  
342 accumulation of SUB and the manifestations in WD<sup>4</sup>. The relevance of these PLS components with other risk genes  
343 was also calculated by specificity analysis, showing that PLS-1 was associated with risk genes of schizophrenia  
344 while PLS-2 was related to genes causing Alzheimer's disease. Consistent with our results, recent studies have  
345 reported that the risk genes of schizophrenia<sup>53</sup> and Alzheimer's disease<sup>54</sup> are significantly associated with  
346 subcortical dysfunction. Interestingly, we found that the spatial pattern of GM volume alteration is similar to that of  
347 PLS-1 with higher expression in subcortical regions, and this association was also exhibited in the cerebral cortex.

348 These findings indicate that the GM volume impairments and gradient perturbation are mediated by similar  
349 transcriptional specializations.

350 Findings have to be interpreted in the context of potential limitations. Gene set from AHBA were sampled from  
351 donors without a diagnosis of WD. Moreover, the associations between connectome gradient and gene expression  
352 were susceptible to intersubject variability. Likewise, the group-averaged gradient was associated with gene  
353 expression data, which could not provide a powerful genetic biomarker for individual prediction. In the future, a  
354 larger sample of whole-brain gene expression data from WD patients is required to further represent and validate  
355 the relationship between connectome gradient and transcriptome. Future studies should also add within-subject  
356 design to perform individual-level prediction for WD.

357 This study revealed the gradient perturbations related to cognitive terms and clinical phenotypes in WD. Then, we  
358 mapped associations of these gradient differences with specific GM volume alterations and transcriptional  
359 expressions. Further, we uncovered the biological underpinnings of these gradient-derived gene sets by enrichment  
360 analysis. The biological underpinnings was determined by underlying factors including 1) function-structure  
361 decoupled characterized by spatial correlation alterations in WD; 2) high associations between gene expression and  
362 gradient-differences and identified biological process within the cerebral cortex; 3) implications in psychiatric and  
363 neurological diseases and for the first time characterizing the role of ATP7B impacting subcortical function; 4) GM  
364 volume impairments and perturbation of connectome gradients are mediated by the similar transcriptional  
365 specializations. In sum, these findings mapping the structural and transcriptomic underpinnings of gradient  
366 perturbation in WD provide a deep insight into WD neurobiological underpinnings underlying the emergence of  
367 complex neurological and psychiatric phenotypes.

368

369 **ACKNOWLEDGEMENT**

370 This work was supported by the National Natural Science Foundation of China (81973825 and U22A20366), the  
371 University Synergy Innovation Program of Anhui Province (GXXT-2020-025), the Project BEBPC-TCM  
372 (2019XZZX-NB001), the Natural Science Research Project of Anhui Universities (KJ2021A0580 and  
373 KJ2021A0555), the Natural Science Foundation of Anhui Province (2108085QH367) and the Open Fund Project of  
374 Key Laboratory of Xin'an Medicine of Ministry of Education (2020xayx12).

375 **CONFLICTS OF INTERESTS**

376 The authors declare that they have no competing interests or financial conflicts.

377 **AUTHOR CONTRIBUTION**

378 W.Y and BQ contributed to the study concept and design; S.H contributed to Conceptualization, Methodology,  
379 Software, Visualization, and Writing -Original Draft; C.L, Y.W and T.W contributed to Writing - Review &  
380 Editing and Methodology; X.W contributed to Review & Editing; T.D, Y.Y and Y.D contributed to the acquisition  
381 the data.

382 **AVAILABILITY OF DATA AND MATERIALS**

383 Anonymised data are available on request to the corresponding author. Gene expression data that was used for  
384 transcriptional analysis can be found in the ABHA database (<https://human.brainmap.org/static/download>).

385 **REFERENCES**

- 386 1. Czlonkowska A, Litwin T, Dusek P, et al. Wilson disease. *Nat Rev Dis Primers* 2018;4:21.
- 387 2. Ferenci P. Regional distribution of mutations of the ATP7B gene in patients with Wilson disease: impact on  
388 genetic testing. *Human genetics* 2006;120:151-159.
- 389 3. Bandmann O, Weiss KH, Kaler SG. Wilson's disease and other neurological copper disorders. *The Lancet*  
390 *Neurology* 2015;14:103-113.
- 391 4. Saito T, Okabe M, Hosokawa T, et al. Immunohistochemical determination of the Wilson Copper-transporting  
392 P-type ATPase in the brain tissues of the rat. *Neuroscience letters* 1999;266:13-16.
- 393 5. Scheiber IF, Dringen R. Copper-treatment increases the cellular GSH content and accelerates GSH export  
394 from cultured rat astrocytes. *Neuroscience letters* 2011;498:42-46.
- 395 6. Bertrand E, Lewandowska E, Szpak G, et al. Neuropathological analysis of pathological forms of astroglia in  
396 Wilson's disease. *Folia Neuropathologica* 2001;39:73-79.
- 397 7. Han YS, Cheng HW, Toledo JB, et al. Impaired functional default mode network in patients with mild  
398 neurological Wilson's disease. *Parkinsonism Relat D* 2016;30:46-51.
- 399 8. Hu XP, Chen SY, Huang CB, Qian YF, Yu YQ. Frequency-dependent changes in the amplitude of  
400 low-frequency fluctuations in patients with Wilson's disease: a resting-state fMRI study. *Metabolic Brain Disease*  
401 2017;32:685-692.
- 402 9. Iwanski S, Seniow J, Lesniak M, Litwin T, Czlonkowska A. Diverse attention deficits in patients with  
403 neurologically symptomatic and asymptomatic Wilson's disease. *Neuropsychology* 2015;29:25-30.
- 404 10. Hu S, Xu C, Wang Y, et al. Basal ganglia-orbitofrontal circuits are associated with prospective memory  
405 deficits in Wilson's disease. *Brain Imaging Behav* 2021.
- 406 11. Tong C, Liu C, Zhang K, et al. Multimodal analysis demonstrating the shaping of functional gradients in the  
407 marmoset brain. *Nature Communications* 2022;13:6584.
- 408 12. Burt JB, Demirtaş M, Eckner WJ, et al. Hierarchy of transcriptomic specialization across human cortex  
409 captured by structural neuroimaging topography. *Nature Neuroscience* 2018;21:1251-1259.
- 410 13. Huntenburg JM, Bazin PL, Margulies DS. Large-Scale Gradients in Human Cortical Organization. *Trends*  
411 *Cogn Sci* 2018;22:21-31.
- 412 14. Zarkali A, McColgan P, Leyland LA, Lees AJ, Rees G, Weil RS. Organisational and neuromodulatory  
413 underpinnings of structural-functional connectivity decoupling in patients with Parkinson's disease. *Commun Biol*  
414 2021;4:86.
- 415 15. Hu Q, Li Y, Wu Y, Lin X, Zhao X. Brain network hierarchy reorganization in Alzheimer's disease: A  
416 resting-state functional magnetic resonance imaging study. *Human Brain Mapping* 2022;43:3498-3507.

- 417 16. Tinaz S, Arora J, Nalamada K, et al. Structural and functional brain changes in hepatic and neurological  
418 Wilson disease. *Brain Imaging Behav* 2021;15:2269-2282.
- 419 17. Margulies DS, Ghosh SS, Goulas A, et al. Situating the default-mode network along a principal gradient of  
420 macroscale cortical organization. *Proc Natl Acad Sci U S A* 2016;113:12574-12579.
- 421 18. Arnatkeviciūtė A, Fulcher BD, Fornito A. A practical guide to linking brain-wide gene expression and  
422 neuroimaging data. *Neuroimage* 2019;189:353-367.
- 423 19. Leinweber B, Möller JC, Scherag A, et al. Evaluation of the Unified Wilson's Disease Rating Scale (UWDRS)  
424 in German patients with treated Wilson's disease. *Movement Disord* 2008;23:54-62.
- 425 20. Good CD, Johnsrude IS, Ashburner J, Henson RN, Friston KJ, Frackowiak RS. A voxel-based morphometric  
426 study of ageing in 465 normal adult human brains. *Neuroimage* 2001;14:21-36.
- 427 21. Smith SM, Nichols TE. Threshold-free cluster enhancement: addressing problems of smoothing, threshold  
428 dependence and localisation in cluster inference. *Neuroimage* 2009;44:83-98.
- 429 22. Hawrylycz MJ, Lein ES, Guillozet-Bongaarts AL, et al. An anatomically comprehensive atlas of the adult  
430 human brain transcriptome. *Nature* 2012;489:391-399.
- 431 23. Hawrylycz M, Miller JA, Menon V, et al. Canonical genetic signatures of the adult human brain. *Nature*  
432 *neuroscience* 2015;18:1832-1844.
- 433 24. Glasser MF, Coalson TS, Robinson EC, et al. A multi-modal parcellation of human cerebral cortex. *Nature*  
434 2016;536:171-178.
- 435 25. Tian Y, Margulies DS, Breakspear M, Zalesky A. Topographic organization of the human subcortex unveiled  
436 with functional connectivity gradients. *Nat Neurosci* 2020;23:1421-1432.
- 437 26. Hong S-J, Vos de Wael R, Bethlehem RA, et al. Atypical functional connectome hierarchy in autism. *Nature*  
438 *communications* 2019;10:1022.
- 439 27. Paquola C, Vos De Wael R, Wagstyl K, et al. Microstructural and functional gradients are increasingly  
440 dissociated in transmodal cortices. *PLoS biology* 2019;17:e3000284.
- 441 28. Larivière S, Vos de Wael R, Hong SJ, et al. Multiscale Structure-Function Gradients in the Neonatal  
442 Connectome. *Cereb Cortex* 2020;30:47-58.
- 443 29. Larivière S, Vos de Wael R, Hong S-J, et al. Multiscale structure–function gradients in the neonatal  
444 connectome. *Cerebral Cortex* 2020;30:47-58.
- 445 30. Gorgolewski KJ, Varoquaux G, Rivera G, et al. NeuroVault. org: a web-based repository for collecting and  
446 sharing unthresholded statistical maps of the human brain. *Frontiers in neuroinformatics* 2015;9:8.



- 447 31. Burt JB, Helmer M, Shinn M, Anticevic A, Murray JD. Generative modeling of brain maps with spatial  
448 autocorrelation. *NeuroImage* 2020;220:117038.
- 449 32. Abdi H. Partial least squares regression and projection on latent structure regression (PLS Regression). *Wiley*  
450 *interdisciplinary reviews: computational statistics* 2010;2:97-106.
- 451 33. Whitaker KJ, Vértes PE, Romero-Garcia R, et al. Adolescence is associated with genomically patterned  
452 consolidation of the hubs of the human brain connectome. *Proceedings of the National Academy of Sciences*  
453 2016;113:9105-9110.
- 454 34. Liao Y, Wang J, Jaehnig EJ, Shi Z, Zhang B. WebGestalt 2019: gene set analysis toolkit with revamped UIs  
455 and APIs. *Nucleic acids research* 2019;47:W199-W205.
- 456 35. Lee HM, Hong S-J, Gill R, et al. Multimodal mapping of regional brain vulnerability to focal cortical  
457 dysplasia. *Brain* 2023:awad060.
- 458 36. Ala A, Walker AP, Ashkan K, Dooley JS, Schilsky ML. Wilson's disease. *The Lancet* 2007;369:397-408.
- 459 37. Nachev P, Kennard C, Husain M. Functional role of the supplementary and pre-supplementary motor areas.  
460 *Nature Reviews Neuroscience* 2008;9:856-869.
- 461 38. Matsuzaka Y, Aizawa H, Tanji J. A motor area rostral to the supplementary motor area (presupplementary  
462 motor area) in the monkey: neuronal activity during a learned motor task. *Journal of neurophysiology*  
463 1992;68:653-662.
- 464 39. Tong F. Primary visual cortex and visual awareness. *Nature Reviews Neuroscience* 2003;4:219-229.
- 465 40. Murray MM, Thelen A, Thut G, Romei V, Martuzzi R, Matusz PJ. The multisensory function of the human  
466 primary visual cortex. *Neuropsychologia* 2016;83:161-169.
- 467 41. Langwinska-Wosko E, Litwin T, Szulborski K, Czlonkowska A. Optical coherence tomography and  
468 electrophysiology of retinal and visual pathways in Wilson's disease. *Metab Brain Dis* 2016;31:405-415.
- 469 42. Dusek P, Lescinskij A, Ruzicka F, et al. Associations of Brain Atrophy and Cerebral Iron Accumulation at  
470 MRI with Clinical Severity in Wilson Disease. *Radiology* 2021;299:662-672.
- 471 43. Buckner RL, Andrews-Hanna JR, Schacter DL. The brain's default network: anatomy, function, and relevance  
472 to disease. *Annals of the new York Academy of Sciences* 2008;1124:1-38.
- 473 44. Sormaz M, Murphy C, Wang H-t, et al. Default mode network can support the level of detail in experience  
474 during active task states. *Proceedings of the National Academy of Sciences* 2018;115:9318-9323.
- 475 45. Wenisch E, De Tassigny A, Trocello JM, Beretti J, Girardot-Tinant N, Woimant F. Cognitive profile in  
476 Wilson's disease: a case series of 31 patients. *Rev Neurol (Paris)* 2013;169:944-949.

- 477 46. Yang Y, Wei T, Yang W, et al. Dysfunction of the Lenticular Nucleus Is Associated with Dystonia in  
478 Wilson's Disease. *Brain Sciences* 2023;13:7.
- 479 47. Maffeo C, Bhattacharya S, Yoo J, Wells D, Aksimentiev A. Modeling and simulation of ion channels.  
480 *Chemical reviews* 2012;112:6250-6284.
- 481 48. Voet D, Voet JG, Pratt CW. *Fundamentals of biochemistry: life at the molecular level* 2013.
- 482 49. O'Leary DD, Koester SE. Development of projection neuron types, axon pathways, and patterned connections  
483 of the mammalian cortex. *Neuron* 1993;10:991-1006.
- 484 50. Greig LC, Woodworth MB, Galazo MJ, Padmanabhan H, Macklis JD. Molecular logic of neocortical  
485 projection neuron specification, development and diversity. *Nature Reviews Neuroscience* 2013;14:755-769.
- 486 51. Karasik D, Kiel DP. Genetics of the musculoskeletal system: a pleiotropic approach. *Journal of Bone and*  
487 *Mineral Research* 2008;23:788-802.
- 488 52. Fatemi N, Sarkar B. Molecular mechanism of copper transport in Wilson disease. *Environmental health*  
489 *perspectives* 2002;110:695-698.
- 490 53. Li A, Zalesky A, Yue W, et al. A neuroimaging biomarker for striatal dysfunction in schizophrenia. *Nat Med*  
491 2020;26:558-565.
- 492 54. Bassett SS, Yousem DM, Cristinzio C, et al. Familial risk for Alzheimer's disease alters fMRI activation  
493 patterns. *Brain* 2006;129:1229-1239.

494

495

496 **Figure legends**

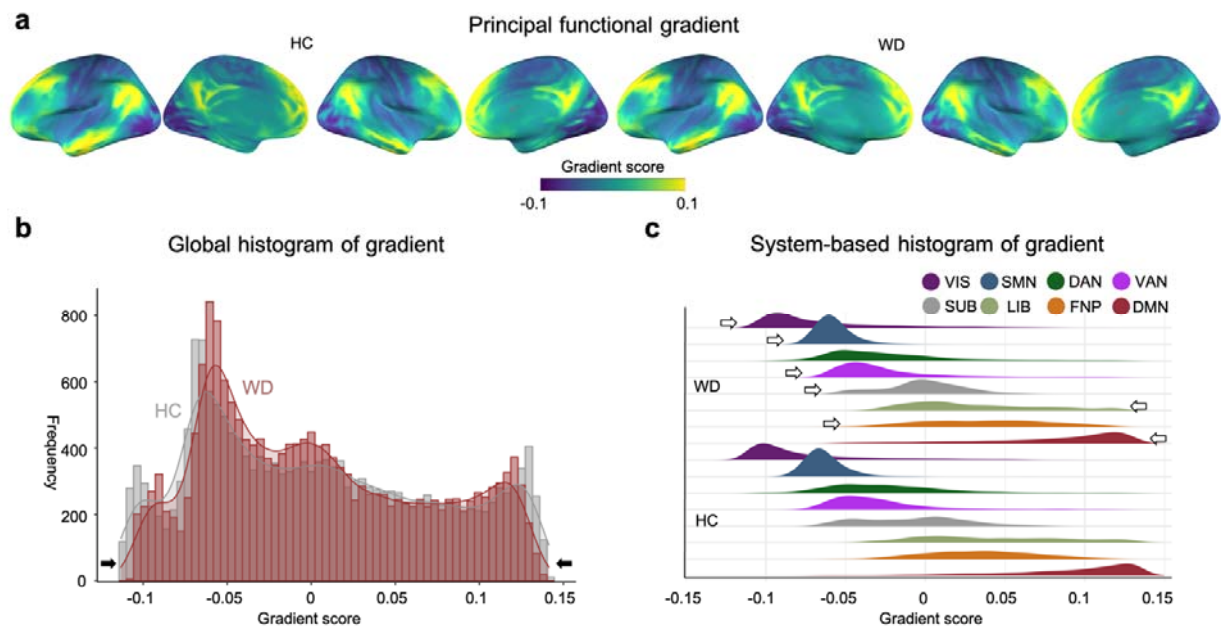

497

498 **Fig. 1 Connectome gradient mapping in WD patients and HCs.** (a) The principal gradient was organized along  
499 a gradual axis from the primary visual/sensorimotor networks to the default mode network. (b) Global histogram of  
500 the gradient. the extreme gradient values were suppressed in the WD patients relative to those of HCs. (c)  
501 System-based histogram of the gradient. Arrows indicate the direction of the significant differences between the  
502 WD patients and HCs. VIS, visual network; SMN, sensorimotor network; DAN, dorsal attention network; VAN,  
503 ventral attention network; SUB, subcortical regions; LIB, limbic network; FPN, frontoparietal network; DMN,  
504 default mode network.  
505

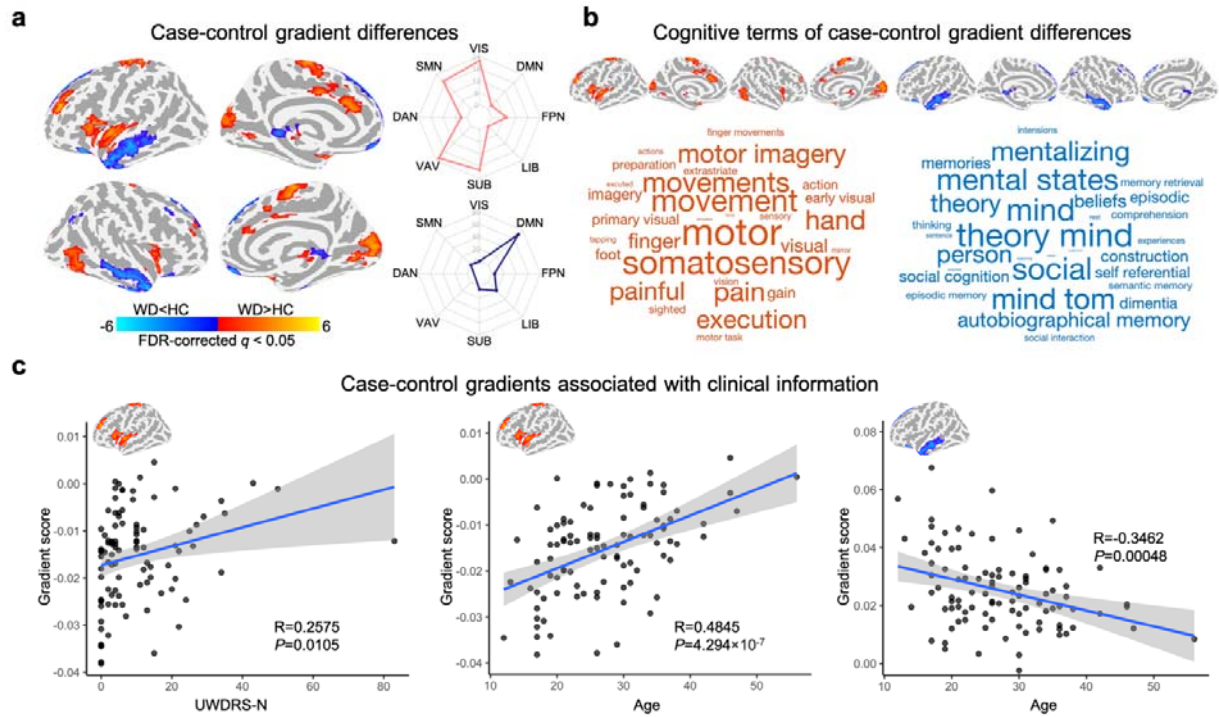

506

507 **Fig. 2 Gradient differences and their associations with cognitive function.** (a) Voxel-wise statistical  
 508 comparisons between the WD patients and HCs and distribution of the regional case-control difference in different  
 509 systems. Higher/lower values in WD are presented as warm/cold colors. The statistical significance level was set as  
 510 FDR voxel level-corrected  $q < 0.05$ . (b) Word clouds of cognitive functions associated with brain regions that  
 511 exhibited higher (red) or lower (blue) gradient scores in WD. The font size of a given cognitive term corresponds to  
 512 the correlation coefficient of the between-group Z-map of the principal gradient with the meta-analytic map of that  
 513 term generated by Neurosynth. (c) Association between regional gradient score and individual UWDRS-N score  
 514 and age. VIS, visual network; SMN, sensorimotor network; DAN, dorsal attention network; VAN, ventral attention  
 515 network; SUB, subcortical regions; LIB, limbic network; FPN, frontoparietal network; DMN, default mode  
 516 network.

517

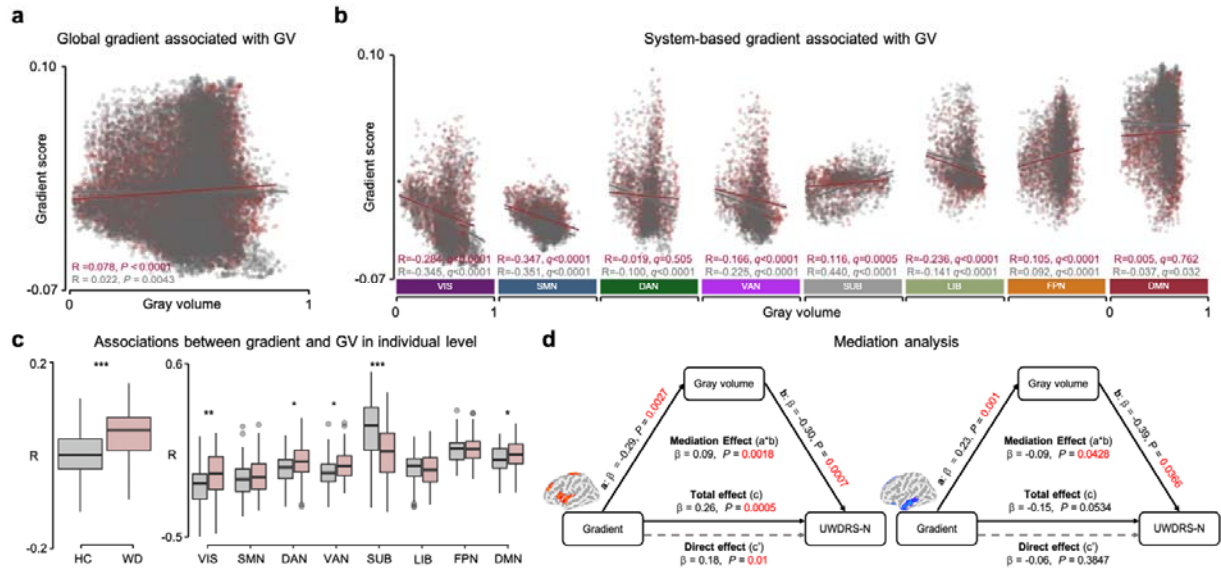

518

519 **Fig. 3 Spatial associations between connectome gradient and GM volume in WD and HC.** (a) Global  
 520 association between gradient and GM volume in WD patients and HCs. (b) System-based associations between  
 521 gradient and GM volume in WD patients and HCs. The  $P$  values were corrected by FDR. (c) Global and  
 522 system-based associations between gradient and GM volume at the individual level and their group differences  
 523 were measured by a two-sample t-test and corrected by FDR. (d) GM volume significantly mediated associations of  
 524 regional gradients with UWDRS-N score. \*,  $P < 0.05$ ; \*\*,  $P < 0.01$ ; \*\*\*,  $P < 0.001$ ; GV, GM volume; VIS, visual  
 525 network; SMN, sensorimotor network; DAN, dorsal attention network; VAN, ventral attention network; SUB,  
 526 subcortical regions; LIB, limbic network; FPN, frontoparietal network; DMN, default mode network.  
 527

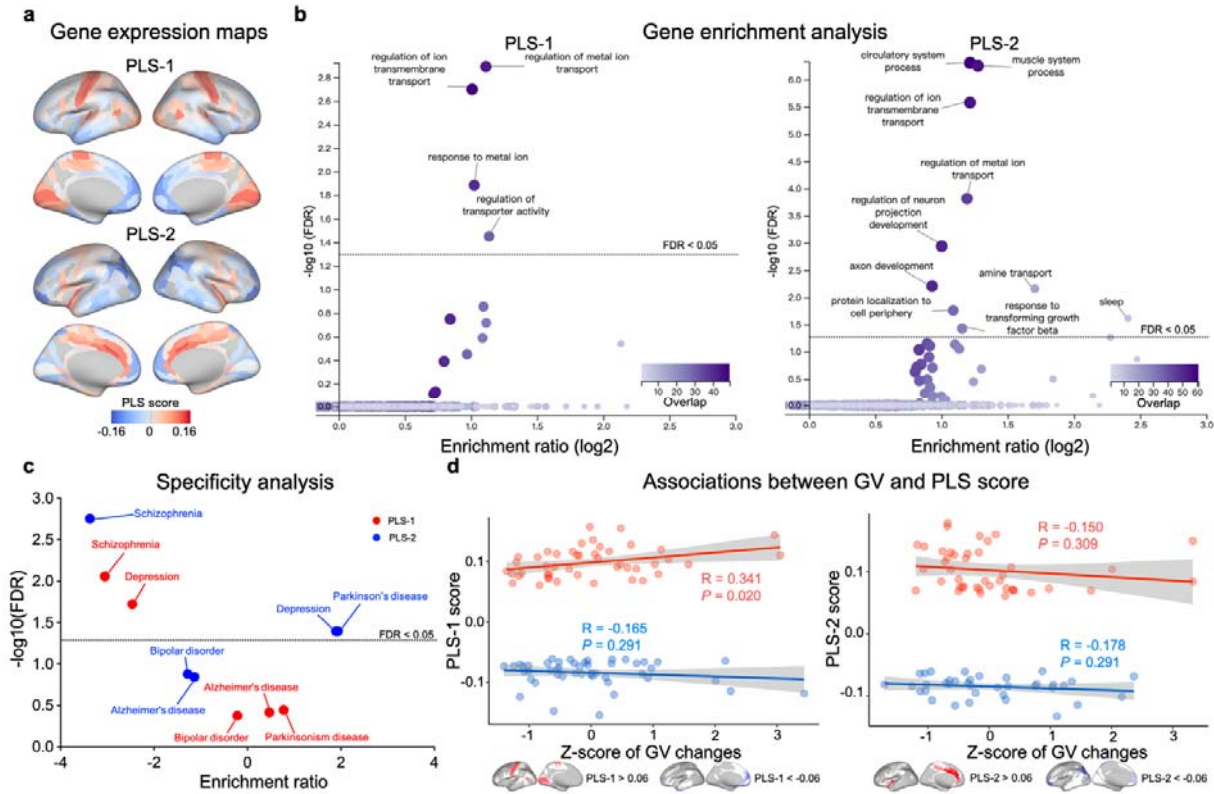

528

529 **Fig. 4 Association between WD-related gradient alterations and gene expression within the cortex.** (a) Maps  
 530 of gene expression within the cortex. The color scale indicates the score for PLS-1 and PLS-2, namely the weighted  
 531 average expression level of 10028. (b) Gene enrichment analysis. Genes associated with PLS-1 were enriched for  
 532 ion transport, ion transmembrane transport, and transporter activity, determining the metal ion homeostasis, and  
 533 PLS-2 for muscle system process and neuron projection development, as well as ion transport and ion  
 534 transmembrane transport. In the volcano plots, the x-axis indicates log<sub>2</sub> of enrichment ratio and the y-axis indicates  
 535 -log<sub>10</sub> of FDR. Color codes indicate the number of genes related to the biological processes that overlap with the  
 536 input list of top 10 percentile genes; the dotted line indicates FDR = 0.05. (c) Specificity analysis. Concerning risk  
 537 genes, PLS-1 (red) and PLS-2 (blue) were enriched for genes associated with Schizophrenia, and depression, while  
 538 PLS-2 was additionally enriched for those associated with Parkinson's disease. The dotted line indicates FDR =  
 539 0.05. (d) Associations between GM volume changes and scores higher than 0.06 and lower than -0.06 in both  
 540 PLS-1 and PLS-2. The PLS-1 scores higher than 0.06 was significantly correlated with GM volume changes. GV,  
 541 GM volume.  
 542



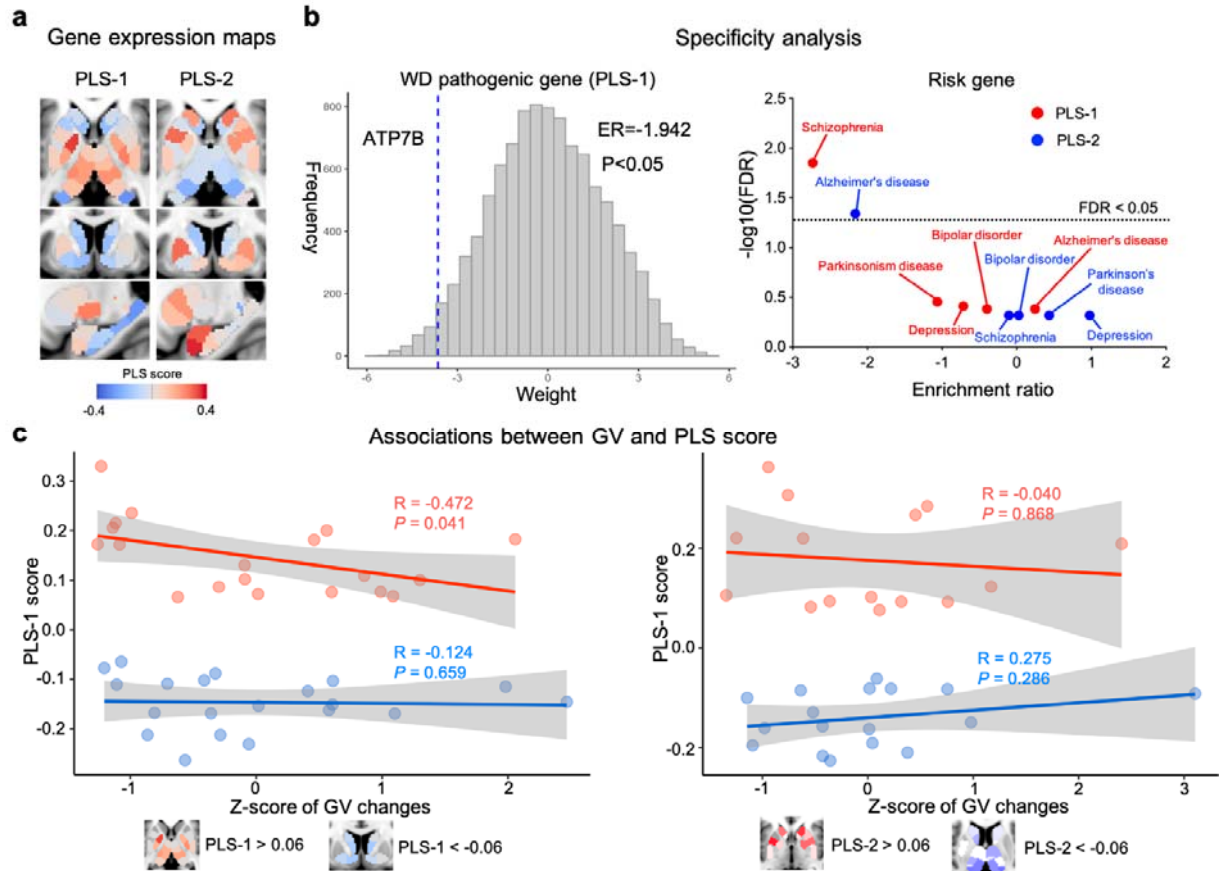

543

544 **Fig. 5 Association between WD-related gradient alterations and gene expression within the subcortical**

545 **regions.** (a) Maps of gene expression within the subcortical regions. The color scale indicates the score for PLS-1

546 and PLS-2, namely the weighted average expression level of 10028. (b) Specificity analysis. PLS-1 was

547 significantly enriched for WD pathogenic genes (ATP7B); the histogram shows bootstrap weights of 10000

548 permutations; the dotted line indicates the bootstrap weight of the candidate genes. Concerning risk genes, PLS-1

549 (red) was enriched for genes associated with Schizophrenia, while PLS-2 (blue) was enriched for those associated

550 with Alzheimer's disease. The dotted line indicates FDR = 0.05. GV, GM volume. (c) Associations between GM

551 volume changes and scores higher than 0.06 and lower than -0.06 in both PLS-1 and PLS-2. The PLS-1 scores

552 higher than 0.06 was significantly correlated with GM volume changes.

553

554 **Table 1 Demographic and clinical characteristics of the WD and HCs**

|                                            | WD<br>n = 105   | HCS<br>n = 93 | P-value |
|--------------------------------------------|-----------------|---------------|---------|
| Age mean (SD), years                       | 27.23 ± 8.30    | 24.48 ± 2.26  | 0.0023  |
| Males, n (%)                               | 59 (60%)        | 60 (64%)      | -       |
| Education mean (SD), years                 | 11.97 ± 3.39    | 15.42 ± 4.06  | < 0.001 |
| Disease duration mean (SD), year           | 9.13 ± 6.67     | -             | -       |
| UWDRS-N score mean (SD)                    | 10.06 ± 12.64   | -             | -       |
| Ceruloplasmin mean (SD), g/L               | 0.041 ± 0.04    | -             | -       |
| 24h urinary copper excretion mean (SD), ug | 850.85 ± 588.56 | -             | -       |

555
